# Supplementary material for: Radiomics feature extraction from ultrasound B-mode images and radiofrequency signals of the carotid arterial wall: a feasibility study
Source: Research Square preprint supplement (doi:10.21203/rs.3.rs-5164876/v1), 2024-12-03
Supplement: Supplementary file 1 [file 8461af94f4bbbc9d4069484d.docx]

**Supplementary Material**

**Full title:** Radiomics feature extraction from ultrasound B-mode images and radiofrequency signals of the carotid arterial wall: a feasibility study

**Authors:** Maryam Jadoon1, Federica Poli1, Pierre Boutouyrie1,2, Hakim Khettab2, Elisabetta Bianchini3, Francesco Faita3 , Xavier Jouven1, , Jean Philippe Empana1*, Rosa Maria Bruno1,2*

*the authors equally contributed to the paper

**Affiliations :**

1 Université Paris Cité, Inserm, PARCC, F-75015 Paris, France

2Clinical Pharmacology Unit, AP-HP, Hôpital européen Georges Pompidou, F-75015 Paris, France

3 Institute of Clinical Physiology, Italian National Research Council (CNR), Pisa, Italy

**Corresponding author and address:**

Maryam Jadoon

[Maryam13khan@gmail.com](mailto:Maryam13khan@gmail.com)

Université Paris Cité, INSERM U970, Team7, Paris Cardiovascular Research Center –PARCC, 56 Rue Leblanc, 75015 Paris, France.

+33749864486

Number of supplementary tables: 2

**Supplementary Material**

Table 1: Intra-class correlation results of all frames.

(threshold >0.50)

| Variable | Roi1 | Variable | Roi1_2 | Variable | Roi1_4 | Variable | Roi1_6 | Variable | VarRoi |
| --- | --- | --- | --- | --- | --- | --- | --- | --- | --- |
| meanvalue | 0.76 | meanvalue | 0.83 | meanvalue | 0.83 | meanvalue | 0.82 | meanvalue | 0.72 |
| skew | 0.74 | skew | 0.79 | skew | 0.83 | skew | 0.81 | skew | 0.64 |
| Kurt | 0.56 | Kurt | 0.64 | Kurt | 0.71 | Kurt | 0.79 | ent | 0.52 |
| ent | 0.57 | ent | 0.61 | ent | 0.6 | ent | 0.59 | median | 0.74 |
| median | 0.78 | median | 0.83 | median | 0.82 | median | 0.81 | std | 0.54 |
| std | 0.68 | std | 0.71 | std | 0.71 | std | 0.68 | meanVett(1) | 0.72 |
| meanVett(1) | 0.76 | meanVett(1) | 0.83 | meanVett(1) | 0.83 | meanVett(1) | 0.82 | meanVett(3) | 0.59 |
| meanVett(3) | 0.67 | meanVett(3) | 0.63 | meanVett(3) | 0.61 | meanVett(3) | 0.59 | meanVett(5) | 0.73 |
| meanVett(5) | 0.77 | meanVett(5) | 0.83 | meanVett(5) | 0.83 | meanVett(5) | 0.82 | meanVett(9) | 0.72 |
| meanVett(9) | 0.76 | meanVett(9) | 0.82 | meanVett(9) | 0.83 | meanVett(9) | 0.82 | meanVett(10) | 0.56 |
| meanVett(10) | 0.57 | meanVett(10) | 0.57 | meanVett(10) | 0.62 | meanVett(10) | 0.61 | SdVett(1) | 0.54 |
| SdVett(1) | 0.68 | SdVett(1) | 0.71 | SdVett(1) | 0.71 | SdVett(1) | 0.68 | SdVett(5) | 0.53 |
| SdVett(5) | 0.68 | SdVett(5) | 0.71 | SdVett(5) | 0.71 | SdVett(5) | 0.69 | SdVett(9) | 0.64 |
| SdVett(9) | 0.71 | SdVett(9) | 0.76 | SdVett(9) | 0.74 | SdVett(9) | 0.73 | SdVett(10) | 0.61 |
| SdVett(10) | 0.61 | SdVett(10) | 0.64 | SdVett(10) | 0.67 | SdVett(10) | 0.69 | med | 0.51 |
| med | 0.57 | med | 0.56 | med | 0.51 | entropia | 0.52 | entropia | 0.54 |
| entropia | 0.59 | entropia | 0.59 | entropia | 0.57 | cont | 0.78 | cont | 0.56 |
| cont | 0.58 | cont | 0.72 | cont | 0.78 | sma | 0.52 | sma | 0.54 |
| sma | 0.58 | sma | 0.59 | sma | 0.56 | coars | 0.55 | coars | 0.52 |
| coars | 0.63 | coars | 0.66 | coars | 0.61 | contr | 0.59 | busyness | 0.56 |
| contr | 0.56 | contr | 0.63 | contr | 0.61 | busyness | 0.65 | complexity | 0.51 |
| busyness | 0.67 | busyness | 0.65 | busyness | 0.7 | complexity | 0.55 | strength | 0.53 |
| complexity | 0.65 | complexity | 0.69 | complexity | 0.66 | strength | 0.6 | LDE | 0.52 |
| strength | 0.64 | strength | 0.61 | strength | 0.6 | LDE | 0.52 | HDE | 0.54 |
| ZP | 0.61 | ZP | 0.58 | LDE | 0.56 | HDE | 0.54 | IDM | 0.61 |
| LDE | 0.57 | LDE | 0.58 | HDE | 0.56 | IDM | 0.64 | ASMM | 0.52 |
| HDE | 0.56 | HDE | 0.56 | IDM | 0.66 | ASMM | 0.61 | IDMM | 0.6 |
| IDM | 0.64 | DCENT | 0.51 | ASMM | 0.59 | IDMM | 0.62 | AUTOCM | 0.7 |
| ASMM | 0.57 | IDM | 0.66 | IDMM | 0.65 | AUTOCM | 0.81 | CORRM | 0.53 |
| IDMM | 0.65 | ASMM | 0.61 | AUTOCM | 0.82 | CORRM | 0.69 | DAM | 0.59 |
| AUTOCM | 0.77 | IDMM | 0.66 | CORRM | 0.76 | DAM | 0.6 | SAM | 0.72 |
| CORRM | 0.69 | AUTOCM | 0.83 | DAM | 0.63 | SAM | 0.83 | JEM | 0.56 |
| DAM | 0.64 | CORRM | 0.71 | SAM | 0.83 | JEM | 0.62 | CM | 0.55 |
| SAM | 0.77 | DAM | 0.65 | JEM | 0.62 | VARM | 0.68 | VARM | 0.54 |
| JEM | 0.58 | SAM | 0.83 | CM | 0.56 | GLNm | 0.69 | SREm | 0.51 |
| CM | 0.62 | JEM | 0.64 | VARM | 0.7 | RLNm | 0.54 | GLNm | 0.51 |
| VARM | 0.68 | CM | 0.61 | SREm | 0.55 | RPm | 0.55 | RLNm | 0.54 |
| SREm | 0.59 | VARM | 0.71 | GLNm | 0.74 | GLVm | 0.77 | RPm | 0.56 |
| LREm | 0.54 | SREm | 0.57 | RLNm | 0.59 | Rem | 0.61 | GLVm | 0.63 |
| GLNm | 0.58 | LREm | 0.51 | RPm | 0.59 | FDsd | 0.52 | Rem | 0.51 |
| RLNm | 0.61 | GLNm | 0.72 | GLVm | 0.79 | FDlac | 0.52 | RF_meanvalue_D | 0.62 |
| RPm | 0.6 | RLNm | 0.6 | Rem | 0.62 | RF_meanvalue_D | 0.84 | median_D | 0.56 |
| GLVm | 0.73 | RPm | 0.59 | FDavg | 0.54 | skew_D | 0.62 | std_D | 0.64 |
| Rem | 0.65 | GLVm | 0.78 | FDsd | 0.56 | median_D | 0.76 | meanvalue_S | 0.63 |
| FDavg | 0.54 | Rem | 0.64 | FDlac | 0.55 | std_D | 0.75 | median_S | 0.59 |
| FDsd | 0.61 | FDavg | 0.58 | RF_meanvalue_D | 0.83 | LDE_D | 0.51 | K_TS | 0.52 |
| FDlac | 0.59 | FDsd | 0.52 | skew_D | 0.53 | IDM_D | 0.5 | Peak_TS | 0.7 |
| RF_meanvalue_D | 0.82 | FDlac | 0.52 | median_D | 0.77 | IDMM_D | 0.51 | Fent_TS | 0.56 |
| median_D | 0.78 | RF_meanvalue_D | 0.81 | std_D | 0.76 | AUTOCM_D | 0.62 |  |  |
| std_D | 0.78 | median_D | 0.77 | strength_D | 0.5 | CORRM_D | 0.56 |  |  |
| contr_D | 0.63 | std_D | 0.78 | IDM_D | 0.52 | DAM_D | 0.52 |  |  |
| ZP_D | 0.55 | coars_D | 0.52 | ASMM_D | 0.55 | SAM_D | 0.62 |  |  |
| LDE_D | 0.52 | strength_D | 0.51 | IDMM_D | 0.52 | CM_D | 0.53 |  |  |
| HDE_D | 0.5 | IDM_D | 0.58 | AUTOCM_D | 0.6 | GLVm_D | 0.61 |  |  |
| IDM_D | 0.53 | ASMM_D | 0.57 | CORRM_D | 0.51 | Rem_D | 0.56 |  |  |
| IDMM_D | 0.55 | IDMM_D | 0.58 | DAM_D | 0.51 | meanvalue_S | 0.7 |  |  |
| CORRM_D | 0.52 | AUTOCM_D | 0.56 | SAM_D | 0.59 | median_S | 0.66 |  |  |
| DAM_D | 0.59 | CORRM_D | 0.54 | JEM_D | 0.55 | K_TS | 0.51 |  |  |
| JEM_D | 0.54 | DAM_D | 0.58 | GLVm_D | 0.57 | Peak_TS | 0.86 |  |  |
| CM_D | 0.63 | SAM_D | 0.54 | meanvalue_S | 0.71 | pTot | 0.67 |  |  |
| VARM_D | 0.63 | JEM_D | 0.59 | median_S | 0.68 |  |  |  |  |
| SREm_D | 0.52 | CM_D | 0.56 | K_TS | 0.5 |  |  |  |  |
| GLNm_D | 0.55 | RLNm_D | 0.51 | Peak_TS | 0.84 |  |  |  |  |
| RLNm_D | 0.56 | GLVm_D | 0.52 | Fent_TS | 0.53 |  |  |  |  |
| RPm_D | 0.53 | Rem_D | 0.53 | pTot | 0.67 |  |  |  |  |
| Rem_D | 0.54 | meanvalue_S | 0.73 |  |  |  |  |  |  |
| meanvalue_S | 0.74 | median_S | 0.7 |  |  |  |  |  |  |
| median_S | 0.7 | CORRM_S | 0.52 |  |  |  |  |  |  |
| CORRM_S | 0.51 | K_TS | 0.51 |  |  |  |  |  |  |
| K_TS | 0.54 | Peak_TS | 0.81 |  |  |  |  |  |  |
| Peak_TS | 0.79 | Fent_TS | 0.56 |  |  |  |  |  |  |
| Fent_TS | 0.58 | pTot | 0.63 |  |  |  |  |  |  |
| pTot | 0.64 |  |  |  |  |  |  |  |  |

The intra-class correlation of each feature was calculated by using feature value from each of 5 ROI sizes across the three frames (1mm, 1.2mm, 1.4mm, 1.6mm, Var Roi). a: The results for each frame are presented as two-way mixed effects Intra-class correlation model with absolute agreement ICC (3,1). Where ROI sizes are considered fixed effects and Patients are considered random effects. b: The results presented only for the features that have ICC>=0.50. The abbreviations: Angular second moment (sma), Angular second moment (ASMM), Busyness (busyness), Complexity (complexity), Contrast (cont), Contrast (contr), Coarseness (coars), Cress factor (CF), cross zero count (Peak_TS), cross zero SD (Fent_TS), DCENT entropy (DCENT), Entropy (DCNU), Entropy (entropia), FD average (FDavg), FD lacunarity (FDlac), FD standard deviation (FDsd), Fussy Entropy (CZsd_TS), Gray-Level Non-uniformity (GLN), Gray-Level Nonuniformity (GLNm), Gray-Level Variance (GLV), Gray-Level Variance (GLVm), Kurtosis (K_TS), Large Zone Emphasis (LZE), large number emphasis (coarsness index) (HDE), Long Run Emphasis (LREm), Mean Autocorrelation (AUTOCM), Mean Contrast (CM), Mean Correlation (CORRM), Mean Dissimilarity (DAM), Mean energy (ASMM), Mean entropy (JEM), Mean entropy (med), Mean homogeneity (IDM), Mean local homogeneity (IDMM), Mean sum average (SAM), Mean variance (VARM), MeanVett1-12 (Mean) (meanVett(1)-meanVett(12)), Mid Band Fit (MBF), M parameter (Nag_mean), Number non-uniformity (DCE), Run entropy (Rem), Run-Length Nonuniformity (RLNm), Run-Length Variance (RLVm), Run Percentage (RPm), SdVett 1-12 (standard deviation) (SdVett(1)-SdVett(12)), Short Run Emphasis (SREm), signal power (pTot), Small number emphasis (finess index) (LDE), Small Zone Emphasis (SZE), S1 parameter (S1), S2 Parameter (S2), S3 Parameter (S3), S4 parameter (S4), Spectral Bandwidth (SB), spectral flatness (SF), Spectral centroid (S_cent), spectral Intercept (SI), spectral slope (SS), Strength (strength), Zone entropy (ZE), Zone Percentage (ZP), Zone-Size Non-uniformity (ZSN), Zone-Size. The variables with _S and _D are features from Feature maps, RF signal skewness intensity diagram and Direct energy attenuation diagram (DEA).

Table 2: Results of feature selection of all frames and ROI sizes (Lasso L1, MRMR and Stepwise)

| Frame | Roi size (mm) | Model | Train MSE | Train R2 | Train Adj R2 | Test MSE | Feat sel* | Model | Train MSE | Train R2 | Train Adj R2 | Test MSE | Feat | Model | Train MSE | Train R2 | Train Adj R2 | Test MSE | Feat sel |
| --- | --- | --- | --- | --- | --- | --- | --- | --- | --- | --- | --- | --- | --- | --- | --- | --- | --- | --- | --- |
| No | (n) | Sel* |
|  |  | (n) |
| 1 | 1 | MRMR | 36.6 | 0.03 | 0.01 | 41.12 | 3 | Lasso | 31.3 | 0.17 | 0.15 | 38.87 | 4 | SW | 32.814 | 0.135 | 0.13 | 36.702 | 1 |
| 1 | 1.2 | MRMR | 25.68 | 0.32 | 0.126 | 59.03 | 13 | Lasso | 27.3 | 0.27 | 0.23 | 54.73 | 8 | SW | 33.049 | 0.129 | 0.123 | 38.333 | 1 |
| 1 | 1.4 | MRMR | 36.68 | 0.02 | 0.016 | 41.59 | 0 | Lasso | 18.6 | 0.5 | 0.42 | 65.36 | 20 | SW | 28.874 | 0.239 | 0.213 | 46.017 | 5 |
| 1 | 1.6 | MRMR | 36.63 | 0.03 | 0.01 | 41.58 | 3 | Lasso | 20.3 | 0.46 | 0.33 | 52.07 | 27 | SW | 25.726 | 0.322 | 0.29 | 53.135 | 7 |
| 1 | Var | MRMR | 36.4 | 0.49 | 0.001 | 41.87 | 5 | Lasso | 31.4 | 0.17 | 0.15 | 46.28 | 4 | SW | 34.238 | 0.098 | 0.092 | 41.434 | 1 |
| 2 | 1 | MRMR | 36.51 | 0.03 | 0.005 | 42.09 | 4 | Lasso | 30.3 | 0.19 | 0.17 | 39.58 | 5 | SW | 32.743 | 0.137 | 0.126 | 34.244 | 2 |
| 2 | 1.2 | MRMR | 36.4 | 0.03 | 0.001 | 41.87 | 5 | Lasso | 40.3 | 0.01 | 0.01 | 33.38 | 0 | SW | 36.768 | 0.082 | 0.07 | 40.737 | 2 |
| 2 | 1.4 | MRMR | 35.89 | 0.04 | 0.009 | 41.11 | 8 | Lasso | 27.2 | 0.28 | 0.22 | 55.28 | 10 | SW | 24.014 | 0.367 | 0.308 | 50.226 | 13 |
| 2 | 1.6 | MRMR | 36.6 | 0.03 | 0.011 | 41.16 | 3 | Lasso | 28.4 | 0.24 | 0.2 | 51.91 | 8 | SW | 36.375 | 0.041 | 0.035 | 40.944 | 1 |
| 2 | Var | MRMR | 36.51 | 0.03 | 0.005 | 42.09 | 4 | Lasso | 30.2 | 0.2 | 0.17 | 46.96 | 6 | SW | 35.077 | 0.076 | 0.07 | 39.53 | 1 |
| 3 | 1 | MRMR | 37.26 | 0.01 | 0 | 42.23 | 2 | Lasso | 31.5 | 0.16 | 0.16 | 43.44 | 2 | SW | 33.091 | 0.128 | 0.116 | 38.955 | 2 |
| 3 | 1.2 | MRMR | 37.26 | 0.01 | 0 | 42.23 | 2 | Lasso | 29.1 | 0.23 | 0.2 | 41.64 | 5 | SW | 33.155 | 0.126 | 0.121 | 35.314 | 1 |
| 3 | 1.4 | MRMR | 36.68 | 0.02 | 0.016 | 41.59 | 2 | Lasso | 32 | 0.15 | 0.13 | 43.77 | 4 | SW | 35.466 | 0.065 | 0.059 | 40.424 | 1 |
| 3 | 1.6 | MRMR | 35.46 | 0.06 | 0.034 | 39.91 | 4 | Lasso | 37.4 | 0 | 0 | 41.62 | 0 | SW | 30.688 | 0.191 | 0.153 | 45.393 | 7 |
| 3 | Var | MRMR | 37.26 | 0.01 | 0 | 42.23 | 2 | Lasso | 33.7 | 0.11 | 0.16 | 35.94 | 2 | SW | 33.545 | 0.116 | 0.11 | 35.071 | 1 |
| Med | Var | MRMR | 24.22 | 0.34 | -0.02 | 54.47 | 2 | Lasso | 33.9 | 0.13 | 30.8 | 0.17 | 3 | SW | 34.29 | 0.12 | 0.11 | 32.12 | 1 |
| Med | 1 | MRMR | 20.48 | 0.44 | 0.13 | 67.90 | 2 | Lasso | 33.2 | 0.15 | 33.1 | 0.11 | 5 | SW | 33.89 | 0.13 | 0.12 | 33.88 | 1 |
| Med | 1.2 | MRMR | 19.90 | 0.46 | 0.15 | 51.04 | 5 | Lasso | 33.2 | 0.14 | 31.9 | 0.15 | 6 | SW | 33.09 | 0.15 | 0.14 | 32.19 | 1 |
| Med | 1.4 | MRMR | 17.76 | 0.52 | 0.24 | 57.16 | 2 | Lasso | 36.2 | 0.07 | 34.8 | 0.07 | 3 | SW | 34.24 | 0.12 | 0.11 | 39.23 | 2 |
| Med | 1.6 | MRMR | 21.31 | 0.42 | 0.09 | 59.27 | 2 | Lasso | - | - | - | - | 0 | SW | 29.52 | 0.24 | 0.19 | 37.94 | 9 |

Dependent Variable: Chronological age. The Mean square Error (MSE) is represented in years. *Feature selected (count) is mentioned as abbreviation, feat sel. Med is the mean of ROI size across 3 frames. Var is the variable Roi. Med is the median value of ROI sizes across the 3 frames.

Early vascular ageing (EVA)

supernormal vascular ageing (SUPERNOVA)

Calcium Score (CAC)

ultrasound (US)

Pulse Wave Velocity (PWV)

Intima-media thickness (IMT)

Magnetic Resonance Imaging (MRI)

Computed Tomography (CT)

Radiofrequency (RF)

Region-of-interest (ROI)

Type 2 Diabetes (T2D)

Paris Prospective Study III (PPS3)

standard deviation (SD)

Intraclass Correlation (ICC)

mean square error (MSE)

least absolute shrinkage and selection operator (Lasso)

Minimum Redundancy Maximum Relevance (MRMR)

Variable (Var)

Intima-Media (IM)
